# Supplementary material for: A tRNA-derived fragment from Chinese yew suppresses ovarian cancer growth via targeting TRPA1
Source: PubMed Central journal article supplement — Mol Ther Nucleic Acids. 2022 Jan 3;27:718–32. doi: 10.1016/j.omtn.2021.12.037 (PMC8905250; doi:10.1016/j.omtn.2021.12.037), 2022-01-03
Supplement: mmc1.pdf [file mmc1.pdf]

OMTN, Volume 27

## Supplemental information

**A tRNA-derived fragment from  
Chinese yew suppresses ovarian  
cancer growth via targeting *TRPA1***

**Kai-Yue Cao, Tong-Meng Yan, Ji-Zhou Zhang, Ting-Fung Chan, Jie Li, Chong Li, Elaine  
Lai-Han Leung, Jin Gao, Bao-Xian Zhang, and Zhi-Hong Jiang**

### **LC-MS/MS analysis of tRF-T11 in four kinds of cancer cells**

To investigate whether tRF-T11 is present in cancer cells, we extracted and enriched small RNAs (Figure S6A, B) from A2780, SK-OV-3, HepG2, and MCF-7 cells ( $5 \times 10^6$  cells for each) in good quality. The results of LC-MS analysis showed that the  $[M-3H]^{3-}$  ion at  $m/z$  2364.0124 of tRF-T11 can be sensitively detected in a range from 0.5 to 1000 ng of tRF-T11, while 0.1 ng of tRF-T11 is undetectable (Figure S6C, D). However, we were not able to detect the  $[M-3H]^{3-}$  ion in the LC-MS chromatograms of the extracted small RNA of the four cancer cells (Figure S6E, F). Thus, the above results demonstrated that the absolute content of tRF-T11 in cancer cells is lower than  $1 \times 10^{-7}$  ng/cell. The current data serve as evidence to clarify that tRF-T11 is not present in four kinds of cancer cells.

**Table S1. Identified tRNA sequences in Chinese yew by NGS sequencing.**

**Table S2. IC<sub>50</sub> values of tRNA<sup>Trp(CCA)</sup>, siRNA, negative sequence and taxol on A2780 cells.**

| Sample                | tRNA <sup>Trp(CCA)</sup> | siRNA | Negative sequence | Taxol |
|-----------------------|--------------------------|-------|-------------------|-------|
| IC <sub>50</sub> (nM) | 14.3                     | 0.25  | >200              | 7.4   |

**Table S3. Synthetic tRF mimics derived from top 9 abundant tRNAs in Chinese yew.**

**Table S4. Identified *Taxus* tRF that possibly target biosynthetic genes of taxol.**

| Biosynthesis gene                            | Genebank number    | Identified tRF                                                                                    |
|----------------------------------------------|--------------------|---------------------------------------------------------------------------------------------------|
| Taxadiene synthase                           | HM113487.1         | tRF-T16, tRF-T33                                                                                  |
| taxane 5-alpha hydroxylase                   | AY289209.2         | NI <sup>a</sup>                                                                                   |
| taxadien-5-alpha-ol-O-acetyltransferase      | AF190130.1         | NI <sup>a</sup>                                                                                   |
| taxane 13-alpha-hydroxylase                  | NM_001154694.2     | tRF-T11, tRF-T16, tRF-T24, tRF-T29, tRF-T32, tRF-T33, tRF-T35, tRF-T39, tRF-T45, tRF-T47, tRF-T48 |
| taxane 10 beta-hydroxylase                   | AY453403.1         | tRF-T29                                                                                           |
| taxane 14b-hydroxylase                       | MH497022.1         | tRF-T27, tRF-T32, tRF-T36                                                                         |
| taxane 2-alpha-hydroxylase                   | AY518383.2         | NI <sup>a</sup>                                                                                   |
| taxane 7β-hydroxylase                        | AY307951.1         | tRF-T27, tRF-T32, tRF-T36                                                                         |
| taxane 2α-O-benzoyl transferase              | AF297618.1         | tRF-T33                                                                                           |
| 10-deacetyl-baccatin Oacetyltransferase      | III-10- AF193765.1 | tRF-T16, tRF-T24, tRF-T32, tRF-T33                                                                |
| phenylalanine aminomutase                    | AY582743.1         | NI <sup>a</sup>                                                                                   |
| 13-O-(3-amino-3-phenylpropanoyl) transferase | AY082804.1         | NI <sup>a</sup>                                                                                   |
| 3'-N-debenzoyltaxol benzoyltransferase       | N- AF466397.1      | tRF-T36                                                                                           |
| Geranylgeranyl diphosphate synthase          | AF081514.1         | tRF-T16, tRF-T29, tRF-T45                                                                         |

NI<sup>a</sup>: not identified.

**Table S5. DNA probes for purification of individual tRNAs.**

| tRNA                     | Probe (5'-3')                  |
|--------------------------|--------------------------------|
| tRNA <sup>His(GUG)</sup> | GGCGAACGACGGGGATTGAACCCGCGCGTG |
| tRNA <sup>Glu(UUC)</sup> | TTGCCTCCTTGAAAGAGAGATGTCCTGGGC |
| tRNA <sup>Trp(CCA)</sup> | ACGGCATCAGGTTTTGGAGACCTGCGTTCT |
| tRNA <sup>Leu(CAA)</sup> | ACGCTGTTTAGCACGAGATTTTGAGTCTCG |
| tRNA <sup>Arg(ACG)</sup> | CGTGGTTCGCAACCACGTGCTCTAATCCTC |

**Table S6. Primers for quantitative real-time PCR.**

| <b>Gene name</b> | <b>Forward (5'-3')</b>    | <b>Reverse (5'-3')</b>   |
|------------------|---------------------------|--------------------------|
| TSPAN17          | GAAGGGCGTTCTCTCGAACA      | AAAGGCCAGGATCCCTGTTG     |
| TRPA1            | TGCATGTTGCATTCCACAGAAG    | TTGAGGGCTGTAAGCGGTTTCATA |
| SCG5             | CTCACCAGGCCATGAATCTT      | TGTTGTCTCCAGTCAACTCTGC   |
| tRF-T11          | GAAGCGGACGTAGCCAAGT       | GTGCGTGTCGTGGAGTCG       |
| U6               | GCTTCGGCAGCACATATACTAAAAT | CGCTTCACGAATTTGCGTGTCAT  |
| <i>β</i> -actin  | GGGAAATCGTGCGTGACATTAAGG  | CAGGAAGGAAGGCTGGAAGAGTG  |



**Table S7. Oligonucleotides used for western blot assay.**

| <b>Oligonucleotides</b> | <b>Forward (5'-3')</b> | <b>Reverse (5'-3')</b> |
|-------------------------|------------------------|------------------------|
| TRPA1_siRNA01           | GGUGGGAUGUUAUCCAATT    | UAUGGAAUAACAUCCACCTT   |
| TRPA1_siRNA02           | GAAGGACGCUCUCCACUUATT  | UAAGUGGAGAGCGUCCUUCTT  |
| Negative sequence       | UUCUCCGAACGUGUCACGUTT  | ACGUGACACGUUCGGAGAATT  |

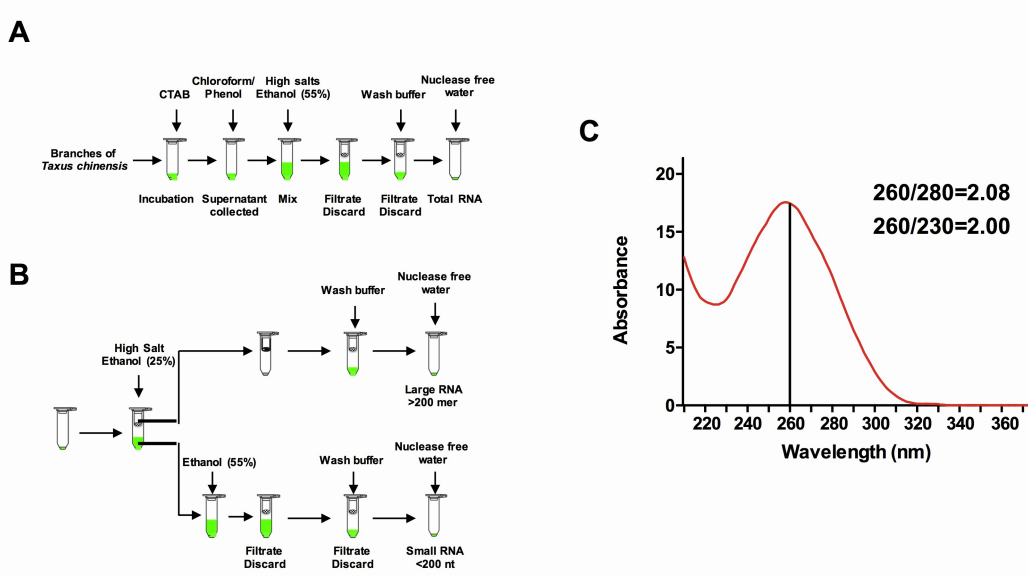

**Figure S1. Extraction and separation of small RNA from *Taxus chinensis* (Pilger) Rehd. var. mairei.** (A) Workflow of total RNA extraction using a developed CTAB-based method. (B) NanoDrop analysis indicated that the extracted total RNA is in high purity. (C) Separation and enrichment of small RNA from large RNA.

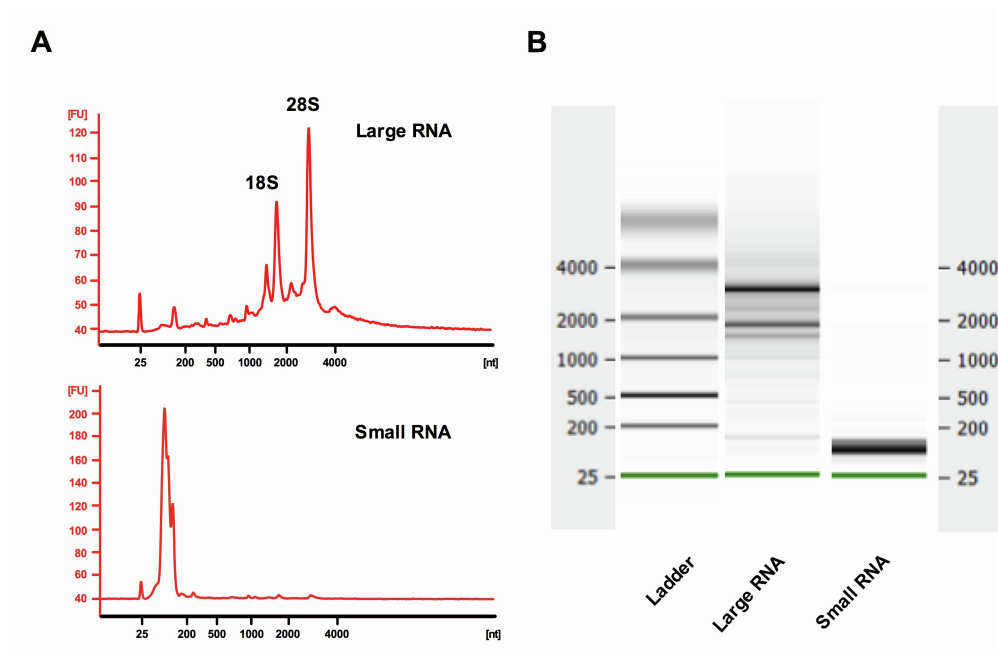

**Figure S2. Quality evaluation confirmed that small RNA was well separated from large RNA. (A)** Agilent 2100 Bioanalyzer profile of small RNA and large RNA from *Taxus chinensis (Pilger) Rehd. var. mairei*. **(B)** Monitored electrophoresis gram of small RNA and large RNA.

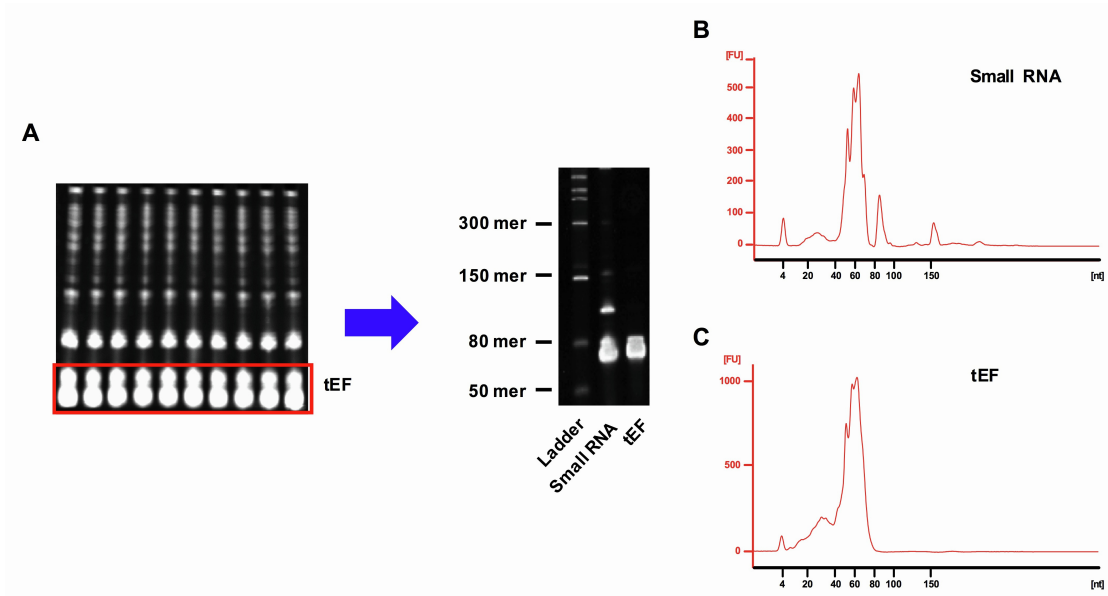

**Figure S3. Preparation of tEF from small RNA of Chinese yew. (A)** Small RNA was gel-fractionated and the representative urea-PAGE image of prepared tEF. **(B)** Agilent 2100 Bioanalyzer showed that compared to small RNA, 5S, 5.8S rRNA and other RNA species could not be detected in the prepared **(C)** tEF.

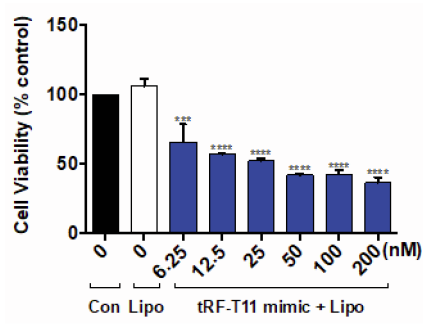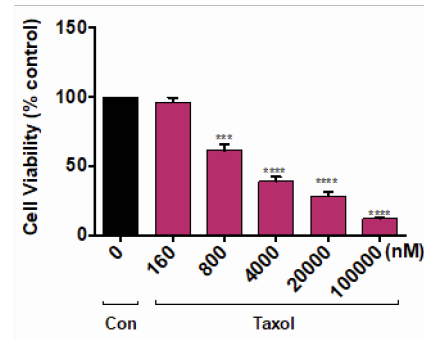

**Figure S4. tRF-T11 mimic exhibited significant inhibitory effects on taxol-resistant A2780 strain.** Data are presented as the means  $\pm$  SDs of three independent experiments. \*\*\* $P < 0.001$ , \*\*\*\* $P < 0.0001$ .

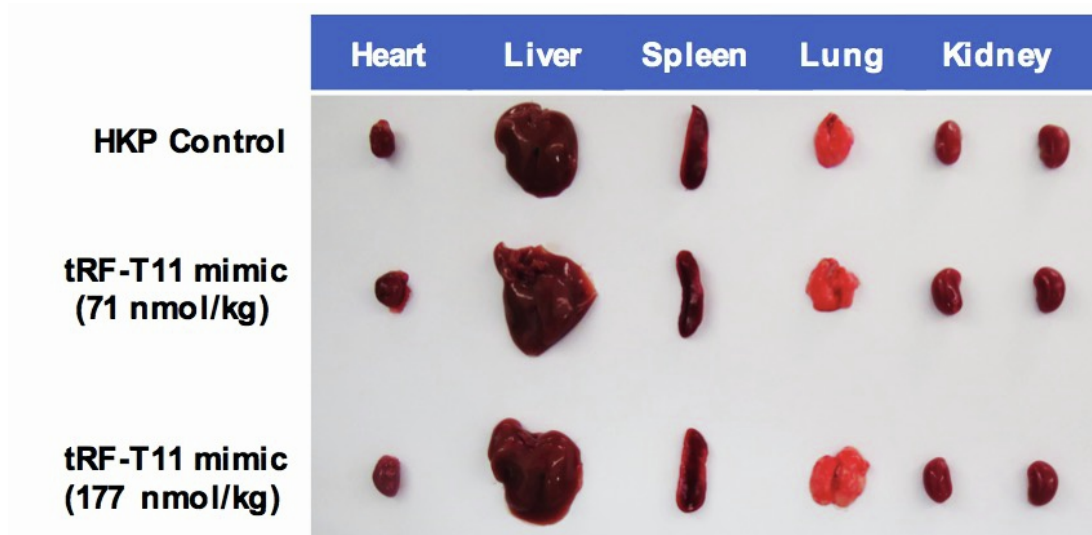

Figure S5. Morphological images of major organs from A2780 xenograft-bearing nude mice.

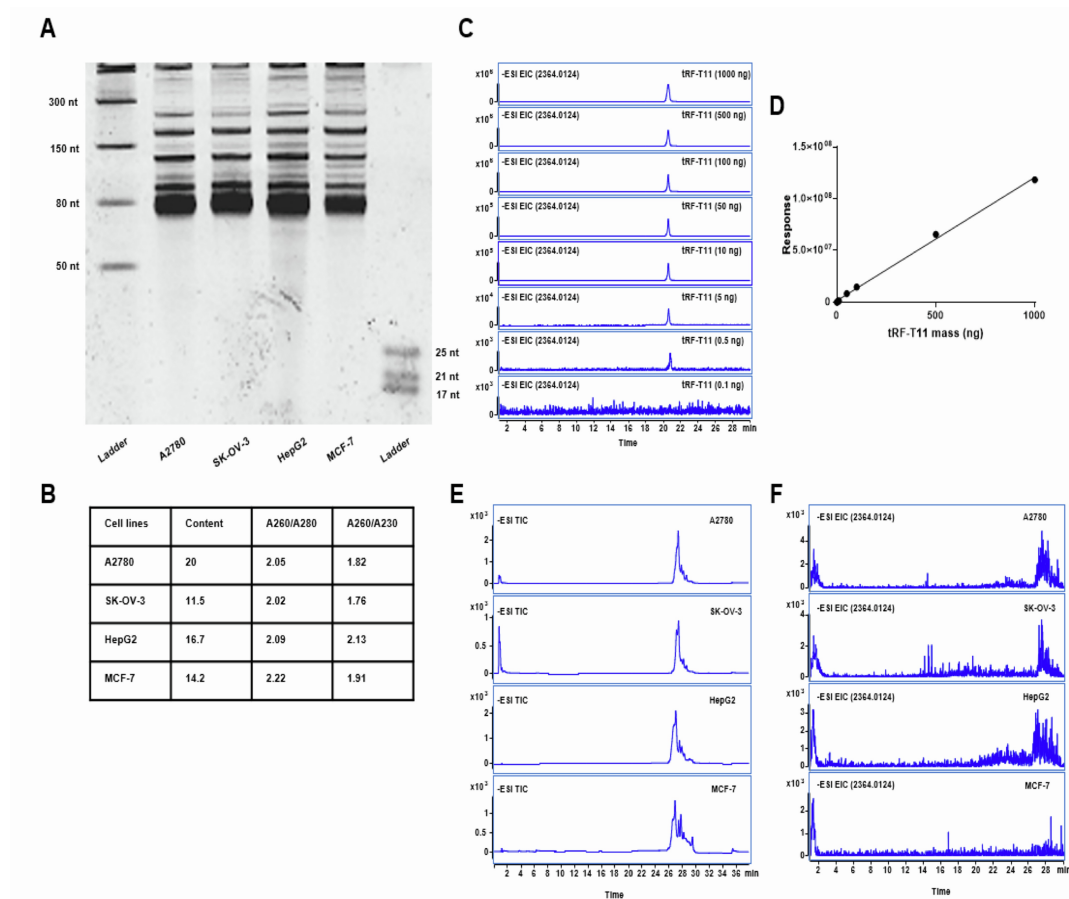

**Figure S6. tRF-T11 is not present in four kinds of cancer cells.** (A) Urea-PAGE analysis of small RNA extracted from A2780, SK-OV-3, HepG2, and MCF-7. (B) Content and quality of extracted small RNA from  $5 \times 10^6$  cells. (C) Extracted ion chromatography of  $[M-3H]^{3-}$  ion at  $m/z$  2364.0124 of tRF-T11 in a range from 0.5 to 1000 ng. (D) Calibration curves of tRF-T11 in a range from 0.5 to 1000 ng. (E) Total ion chromatography of small RNA from cancer cells. (F)  $[M-3H]^{3-}$  ion at  $m/z$  2364.0124 of tRF-T11 were undetected in the extracted ion chromatography of small RNA from four kinds of cancer cells.
